# Supplementary material for: DNA Deamination Is Required for Human APOBEC3A-Driven Hepatocellular Carcinoma In Vivo
Source: Preprints.org preprint supplement (doi:10.20944/preprints202305.0072.v1), 2023-05-02
Supplement: Supplementary file 1 [file supplementary]

## Supplementary Materials for

### DNA Deamination Is Required for Human APOBEC3A-Driven Hepatocellular Carcinoma *In Vivo*

Running title: Human APOBEC3A as a Master Driver of Cancer

Jordan A Naumann<sup>1,2</sup>, Prokopios P Argyris<sup>1,2,3,4</sup>, Michael A Carpenter<sup>5,6</sup>, Harshita B Gupta<sup>5</sup>, Yanjun Chen<sup>5</sup>, Nuri A Temiz<sup>2,7</sup>, Yufan Zhou<sup>5</sup>, Cameron Durfee<sup>5</sup>, Joshua Proehl<sup>5</sup>, Brenda L Koniar<sup>2</sup>, Silvestro Conticello<sup>8</sup>, David A Largaespada<sup>2,9</sup>, William L. Brown<sup>1,2</sup>, Hideki Aihara<sup>1,2</sup>, Rachel I Vogel<sup>2,10</sup>, Reuben S Harris<sup>5,6,\*</sup>

<sup>1</sup> Department of Biochemistry, Molecular Biology and Biophysics, University of Minnesota, Minneapolis, MN 55455, USA

<sup>2</sup> Masonic Cancer Center, University of Minnesota, Minneapolis, MN 55455, USA

<sup>3</sup> Howard Hughes Medical Institute, University of Minnesota, Minneapolis, MN 55455, USA

<sup>4</sup> Division of Oral and Maxillofacial Pathology, College of Dentistry, Ohio State University, Columbus, OH 43210, USA

<sup>5</sup> Department of Biochemistry and Structural Biology, University of Texas Health San Antonio, San Antonio, TX 78229, USA

<sup>6</sup> Howard Hughes Medical Institute, University of Texas Health San Antonio, San Antonio, TX 78229, USA

<sup>7</sup> Institute for Health Informatics, University of Minnesota, Minneapolis, MN 55455, USA

<sup>8</sup> Core Research Laboratory, ISPRO, Florence, Italy

<sup>9</sup> Department of Pediatrics, University of Minnesota, Minneapolis, Minnesota, USA

<sup>10</sup> Department of Obstetrics, Gynecology, and Women's Health, University of Minnesota, Minneapolis, Minnesota, USA

\* Correspondence to Reuben S. Harris, email: [rsh@uthscsa.edu](mailto:rsh@uthscsa.edu)

Supplementary Information: Supplementary Figures S1-S3

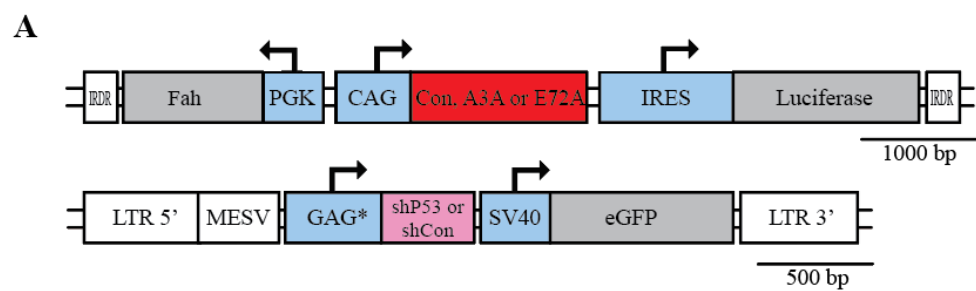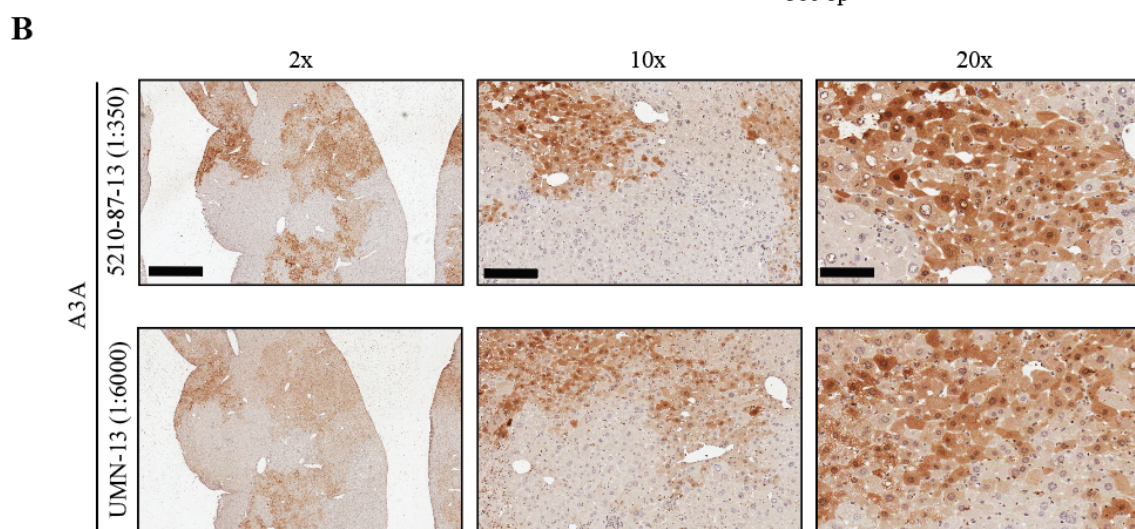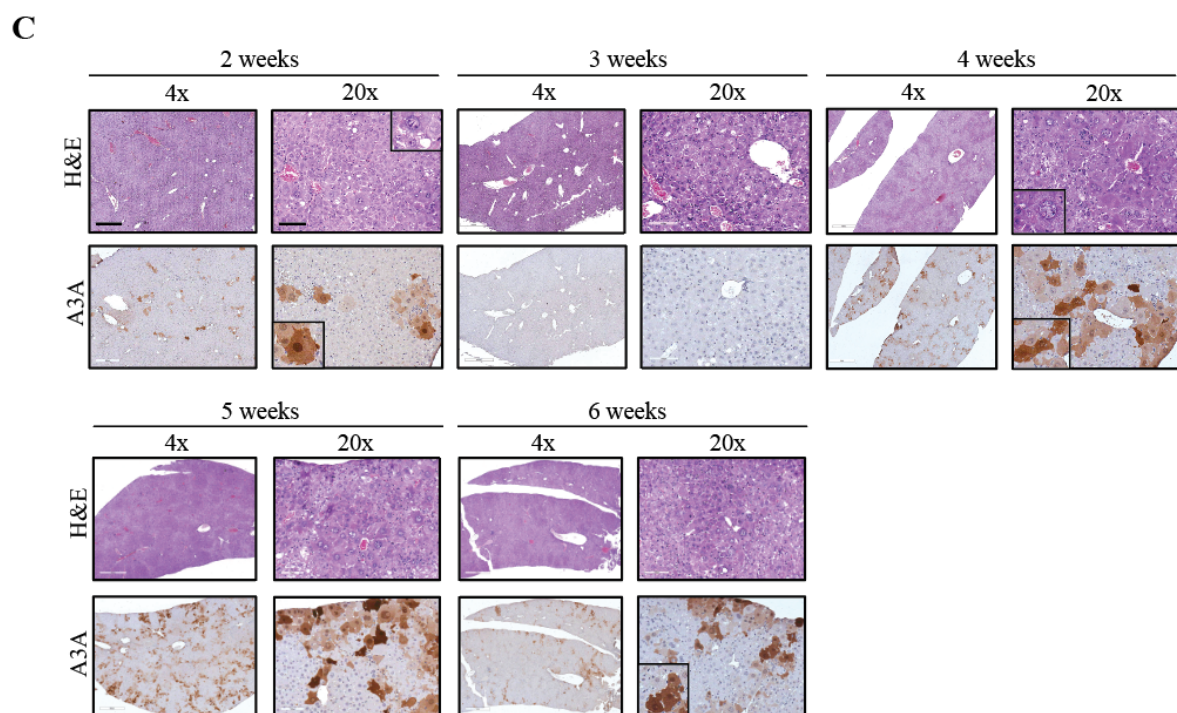

**Supplementary Figure S1. Human A3A expression in murine hepatocytes.**

- (a) Schematic representation of Fah-restorative and shRNA constructs used for hydrodynamic injections in Figure 1. Scale bar, 1000 bp and 500 bp, respectively.
- (b) Comparative IHC analysis of consecutive sections of A3A expressing livers stained with  $\alpha$ -A3A monoclonal antibodies, 5210-87-13 or UMN-13, at 1:350 or 1:6,000 dilutions, respectively. Scale bar, 1mm, 200  $\mu$ m, and 100  $\mu$ m for 2x, 10x, and 20x magnification, respectively.
- (c) Representative H&E and A3A IHC (UMN-13) photomicrographs of A3A livers harvested 2-6 weeks p.i. Scale bar, 1 mm and 100  $\mu$ m for 4x and 20x magnification, respectively, and inset images are magnified 4-fold.

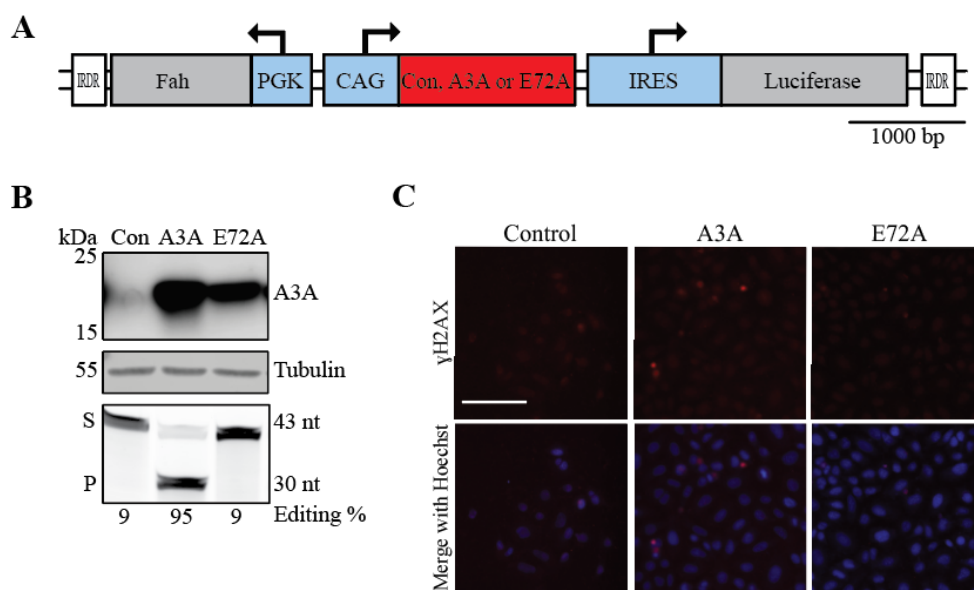

**Supplementary Figure S2. The catalytic activity of A3A induces genomic damage.**

- (a) Schematic representation of E72A construct used for hydrodynamic injections. Scale bar, 1000 basepairs.
- (b) Immunoblot (upper panels; 5210-87-13) and DNA deaminase activity assay (lower panel) of whole cell lysates of HeLa cells transfected with constructs containing A3A, E72A or control. Control (Con); substrate (S); product (P); nucleotides (nt). DNA deaminase activity quantification of band volume intensities (ratio of substrate to product) by densitometry reported below as Editing %.
- (c) Immunofluorescence analysis of transfected HeLa cells stained for  $\gamma$ -H2AX and counterstained for DNA with Hoescht. Scale bar, 100  $\mu$ m.

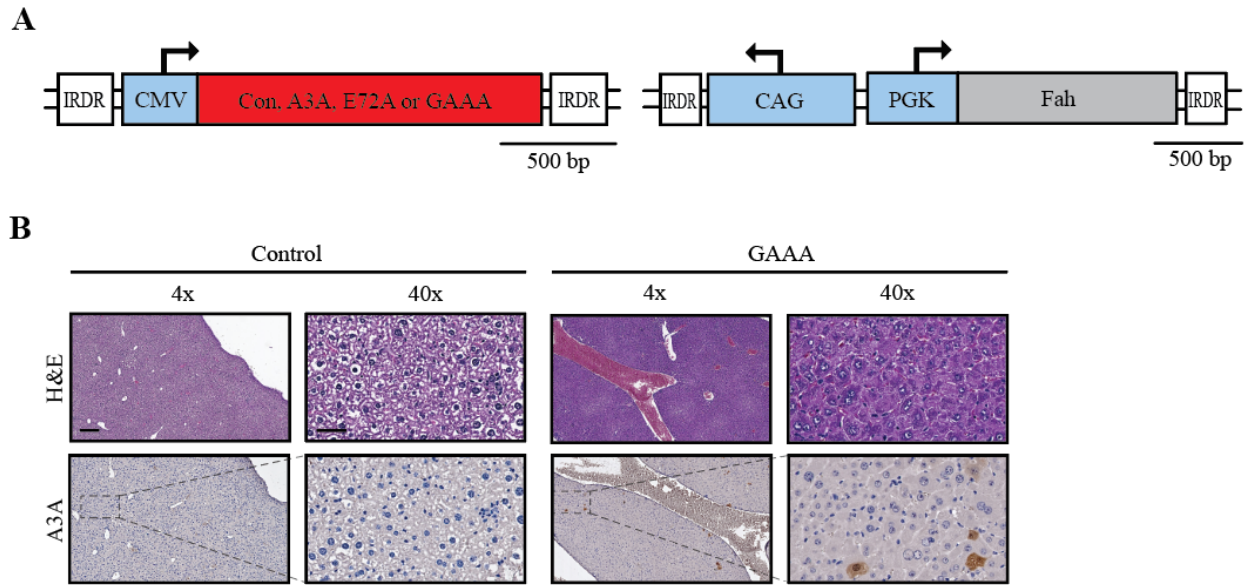

**Supplementary Figure S3. A3A-GAAA mutant expression in hepatocytes.**

- (a) Schematic representations of constructs used for all experiments in Figure 4. Scale bars, 500 bp.
- (b) H&E and IHC (UMN-13) of representative livers from the Control and GAAA cohorts harvested 72 hours p.i. Scale bar, 500  $\mu$ m or 50  $\mu$ m for 4x and 40x magnification, respectively.
